# Supplementary material for: Sustainability Assessment of Combined Animal Fodder and Fuel Production from Microalgal Biomass
Source: Int J Environ Res Public Health. 2021 Oct 28;18(21):11351. doi: 10.3390/ijerph182111351 (PMC8583398; doi:10.3390/ijerph182111351)
Supplement: Supplementary file 1 [file ijerph-18-11351-s001.zip › SI2.xlsx]

## Sheet: database
Database	AF_fodder
Activity	production of suspended algae biomass, open race way pond
location	ES
unit	kg
description
Exchanges
name	amount	unit	location	type	uncertainty type	loc	scale	comment
technosphere
nutrient supply from urea	3.84445e-05	kg	RER	technosphere	0
nutrient supply from triple superphosphate	7.7254e-06	kg	RER	technosphere	0
CO2 production, biogas CHP with carbon capture	0.00133211	kg	ES	technosphere	0
tap water production, seawater reverse osmosis, conventional pretreatment, baseline module, single stage	0	kg	GLO	technosphere	0
market for magnesium sulfate	0	kg	GLO	technosphere	0
market for electricity, medium voltage	0.00035091	kWh	ES	technosphere	0
infrastructure for algae cultivation	1	1/kg_harvest	ES	technosphere	0
treatment of discharged algae cultivation medium	-9.40019e-07	m3	ES	technosphere	0			nutrient left-overs to ocean
biosphere
Water	0	m3	('air', 'low population density, long-term')	biosphere	0			evaporation set to zero because water comes from the sea -> no net water impact
Water	-0.00054268	m3	('water', 'ocean')	biosphere	0			make-up salt water
Carbon dioxide, non-fossil	0.000333027	kg	('air', 'low population density, long-term')	biosphere	0
product
production of suspended algae biomass, open race way pond	1	kg	ES	production	0
Activity	infrastructure for algae cultivation
location	ES
unit	1/kg_harvest
description
aggregate	TRUE
Exchanges
name	amount	unit	location	type	uncertainty type	loc	scale	comment
market for concrete, sole plate and foundation	0	m3	CH	technosphere	0
market for polyvinylchloride, bulk polymerised	0	kg	GLO	technosphere	0
market for packaging film, low density polyethylene	2.22222e-06	kg	GLO	technosphere	0
market for water supply network	2.06499e-11	km	GLO	technosphere	0
market for waste concrete	0	kg	Europe without Switzerland	technosphere	0
market for waste polyvinylchloride	0	kg	ES	technosphere	0
market for waste polyethylene	-2.22222e-06	kg	ES	technosphere	0
market for decommissioned pipeline, natural gas	-2.06499e-06	kg	RoW	technosphere	0
Occupation, industrial area	0.000138889	square meter-year	('natural resource', 'land')	biosphere	0
Transformation, to industrial area	6.94444e-06	square meter	('natural resource', 'land')	biosphere	0
Transformation, from unspecified, natural (non-use)	6.94444e-06	square meter	('natural resource', 'land')	biosphere	0
market for land use change, annual crop	6.94444e-10	ha	ES	technosphere	0
infrastructure for algae cultivation	1	1/kg_harvest	ES	production	0
Activity	production of algae concentrate using flocculation
location	ES
unit	kg
description
Exchanges
name	amount	unit	location	type	uncertainty type	loc	scale	comment
production of suspended algae biomass, open race way pond	42.1053	kg	ES	technosphere	0
market for lime	0.00842105	kg	RER	technosphere	0
market for hydrochloric acid, without water, in 30% solution state	0.00828807	kg	RER	technosphere	0
market for electricity, medium voltage	0	kWh	ES	technosphere	0
production of algae concentrate using flocculation	1	kg	ES	production	0
treatment of discharged algae cultivation medium	-0.0142709	m3	ES	technosphere	0
Activity	drying of algae concentrate using centrifuge
location	ES
unit	kg
description
Exchanges
name	amount	unit	location	type	uncertainty type	loc	scale	comment
technosphere
production of algae concentrate using flocculation	10.5263	kg	ES	technosphere	0			feed
market for electricity, medium voltage	0.0421053	kWh	ES	technosphere	0
treatment of discharged algae cultivation medium	-0.00952632	m3	ES	technosphere	0
product
drying of algae concentrate using centrifuge	1	kg	ES	production	0
Activity	cell disruption, beat milling
location	ES
unit	kg
description
Exchanges
name	amount	unit	location	type	uncertainty type	loc	scale	comment
technosphere
drying of algae concentrate using centrifuge	1	kg	ES	technosphere	0			feed
Water	-0.00117	m3	('water', 'surface water')	biosphere	0			cooling water in
Water	0.00117	m3	('air', 'low population density, long-term')	biosphere	0			cooling water out
market for electricity, medium voltage	0.0580698	kWh	ES	technosphere	0
product
cell disruption, beat milling	1	kg	ES	production	0
Activity	production of algae oil, hexane extraction
location	ES
unit	kg
description
Exchanges
name	amount	unit	location	type	uncertainty type	loc	scale	comment
technosphere
cell disruption, beat milling	17.5439	kg	ES	technosphere	0			feed
market for electricity, medium voltage	0.54	kWh	ES	technosphere	0
heat and power co-generation, natural gas, combined cycle power plant, 400MW electrical	6.12	MJ	ES	technosphere	0
market for hexane	0.0052	kg	GLO	technosphere	0
product
production of algae oil, hexane extraction	1	kg	ES	production	0
treatment of extraction residues, spray-drying	16.5491	kg	ES	technosphere	0
Activity	treatment of extraction residues, spray-drying
location	ES
unit	kg
description
aggregate	TRUE
Exchanges
name	amount	unit	location	type	uncertainty type	loc	scale	comment
treatment of extraction residues, spray-drying	1	kg	ES	production	0
market for chemical factory, organics	5.01057e-12	unit	GLO	technosphere	0
market for electricity, medium voltage	0.0720756	kWh	ES	technosphere	0
market for tap water	0.0938857	kg	Europe without Switzerland	technosphere	0
heat and power co-generation, natural gas, combined cycle power plant, 400MW electrical	4.45244	MJ	ES	technosphere	0
market for soybean meal	-0.133857	kg	GLO	technosphere	0			spray-drying product is assumed to be nutritionally identical to soybean meal
Water	9.38857e-05	m3	water:ground-	biosphere	0
Activity	production of fuels from algae oil, hydroprocessing
location	NL
unit	MJ
description
Exchanges
name	amount	unit	location	type	uncertainty type	loc	scale	comment
technosphere
market for transport, freight, lorry 16-32 metric ton, EURO6	0.00157919	ton kilometer	RER	technosphere	0			see oil transport
market group for transport, freight train	0.00315837	ton kilometer	RER	technosphere	0			see oil transport
market for transport, freight, sea, tanker for petroleum	0.110543	ton kilometer	GLO	technosphere	0			see oil transport
production of algae oil, hexane extraction	0.0315837	kg	ES	technosphere	0			feed
market for phosphoric acid, industrial grade, without water, in 85% solution state	1.95187e-05	kg	GLO	technosphere	0
market for sodium hydroxide, without water, in 50% solution state	5.84299e-05	kg	GLO	technosphere	0
market for electricity, medium voltage	0.00211436	kWh	NL	technosphere	0
biosphere
Carbon dioxide, non-fossil	0.0156024	kg	('air', 'low population density, long-term')	biosphere	0
Water	-1.74342e-05	m3	('water', 'surface water')	biosphere	0			freshwater in for feed & process water
Water	-0.000114649	m3	('water', 'ocean')	biosphere				sea water in for cooling
production
production of fuels from algae oil, hydroprocessing	1	MJ	NL	production	0
Activity	fuel at user
location	NL
unit	MJ
description
Exchanges
name	amount	unit	location	type	uncertainty type	loc	scale	comment
technosphere
market for transport, freight, lorry 16-32 metric ton, EURO6	0.00115644	ton kilometer	RER	technosphere	0
market for transport, pipeline, onshore, petroleum	0.00925151	ton kilometer	RER	technosphere	0
production of fuels from algae oil, hydroprocessing	1	MJ	NL	technosphere	0
production
fuel at user	1	MJ	NL	production	0
Activity	conventional reference WTT
location	ES+NL
unit	MJ
description	production of 1 MJ of fuels, by-products: heat and electricity
Exchanges
name	amount	unit	location	type	uncertainty type	loc	scale	comment
technosphere
market for naphtha	0.00467439	kg	RER	technosphere	0			no ecoinvent NL-specific activity available
market for kerosene	0.0156655	kg	Europe without Switzerland	technosphere	0			no ecoinvent NL-specific activity available
market for diesel	0.00278884	kg	Europe without Switzerland	technosphere	0			no ecoinvent NL-specific activity available
conventional reference WTT	1	MJ	ES+NL	production	0
Activity	fuel combustion
location	NL
unit	MJ
description
Exchanges
name	amount	unit	location	type	uncertainty type	loc	scale	comment
fuel at user	1	MJ	NL	technosphere	0
Carbon dioxide, non-fossil	0.0717361	kg	('air', 'low population density, long-term')	biosphere	0
fuel combustion	1	MJ	NL	production	0
Activity	conventional reference WTW
location	ES+NL
unit	MJ
description	combustion of 1 MJ of fuels
Exchanges
name	amount	unit	location	type	uncertainty type	loc	scale	comment
market for naphtha	0.00467439	kg	RER	technosphere	0			no ecoinvent NL-specific activity available
market for kerosene	0.0156655	kg	Europe without Switzerland	technosphere	0			no ecoinvent NL-specific activity available
market for diesel	0.00278884	kg	Europe without Switzerland	technosphere	0			no ecoinvent NL-specific activity available
Carbon dioxide, fossil	0.0717361	kg	('air', 'low population density, long-term')	biosphere	0
conventional reference WTW	1	MJ	ES+NL	production	0
Activity	CO2 production, biogas CHP with carbon capture
location	ES
unit	kg
description
aggregate	TRUE
Exchanges
name	amount	unit	location	type	uncertainty type	loc	scale	comment
heat and power co-generation, biogas, gas engine	6.3474	MJ	ES	technosphere	0
heat and power co-generation, biogas, gas engine	1.23092	kWh	ES	technosphere	0
CO2 production, biogas CHP with carbon capture	1	kg	ES	production	0
market for electricity, high voltage	-1.13244	kWh	ES	technosphere	0			generated coal-electricity displaces grid electricity
heat and power co-generation, natural gas, combined cycle power plant, 400MW electrical	-5.83961	MJ	ES	technosphere	0			generated coal-heat displaces grid electricity
Activity	treatment of discharged algae cultivation medium
location	ES
unit	m3
description	Ecoinvent process treatment of wastewater, average, capacity 1.1E10l/year, CH adapted to remove impact of dissipated water (because it is all seawater)
aggregate	TRUE
Exchanges
name	amount	unit	location	type	uncertainty type	loc	scale	comment
Water	0.1	m3	('air', 'low population density, long-term')	biosphere	0	0	0
treatment of wastewater, average, capacity 1.1E10l/year	1	m3	CH	technosphere	0	0	0
treatment of discharged algae cultivation medium	1	m3	ES	production	0	0	0
Activity	market for soybean meal
location	GLO
unit	kg
description	approximation of world production
aggregate	TRUE
Exchanges
name	amount	unit	location	type	uncertainty type	loc	scale	comment	code
soybean meal and crude oil production	0.45	kg	US	technosphere	0				292e0eeb48136500e213e97291a9a546
soybean meal and crude oil production	0.55	kg	BR	technosphere	0				e822e2ac0c0fc02081ee21d6a3481efc
market for soybean meal	1	kg	GLO	production	0				custom_soy

## Sheet: overview
skip
ORP			infrastructure			CHP			flocculation			centrifuge			bead mill			extraction			spray-drying			bio-oil transport			conversion			fuel transport
in
N	0.00944138	kg	concrete	0	m3	heat	1.9104	MJ	harvest	245.585	kg	feed	5.83264	kg	feed	0.554101	kg	feed	0.554101	kg	residues	0.522681	kg	oil	0.0315837	kg	feed oil	0.0315837	kg	fuels	0.0231288	kg
P2O5	0.00189724	kg	PVC	0	kg	electricity	0.370473	kWh	electricity	0	kWh	electricity	0.0233306	kWh	electricity	0.0321765	kWh	electricity	0.0170552	kWh	infrastructure	2.61893e-12	unit	truck	0.00157919	km*t	phosphporic acid	1.95187e-05	kg	pipeline transport	0.00925151	km*t
CO2 from power plant	0.327145	kg	LDPE	0.000545744	kg	CO2 captured	0.327145	kg	flocculant	0.049117	kg				cooling water	0.000648298	m3	heat	0.193292	MJ	electricity	0.0376726	kWh	rail	0.00315837	km*t	NaOH	5.84299e-05	kg	truck transport	0.00115644	km*t
CO2 from biogas plant	0	kg	pipeline	5.07131e-09	km				acid	0.0483413	kg							hexane	0.000164235	kg	water	0.0490723	kg	tanker	0.110543	km*t	feed water	0.0142127	kg
fresh water	0	kg																			heat	2.32721	MJ				process water	0.00322154	kg
salt water	133.274	kg	concrete EoL	0	kg																						cooling water (sea water)	0.114649	kg
recycled harvest	156.613	kg	PVC EoL	0	kg																						air	0.0375846	kg
MgSO4	0	kg	LDPE EoL	-0.000545744	kg																						electricity	0.00211436	kWh
electricity	0.0861782	kWh	pipeline EoL	-0.000507131	kg
			land use	1.70545e-07	ha
out			occupation	0.034109	m2-yr
evaporation	0.0443417	m3							concentrate	5.83264	kg	centrate	0.554101	kg	slurry	0.554101	kg	oil	0.0315837	kg	feed	0.0699645	kg	oil	0.0315837	kg	naphtha	0.00467439	kg	fuels	0.0231288	kg
harvest	245.585	kg							waste water to ORP	156.613	kg	supernatant	5.27854	kg	cooling water	0.000648298	m3	residues	0.522681	kg	evaporated water	4.90723e-05	m3				jet fuel	0.0156655	kg
nutrient left-overs	0.230854	kg							waste water to treatment	83.2369	kg																diesel	0.00278884	kg
CO2	0.0817863	kg																									CO2	0.0156024	kg
																											waste water	0.0130441	kg
																											solids	0.000337946	kg
																											feed water loss	0.000394797	kg
																											cooling water (sea water)	0.114649	kg
																											air	0.0375846	kg
implementation check
ORP			infrastructure			CHP			flocculation			centrifuge			bead mill			extraction			spray-drying			bio-oil transport			conversion			fuel transport
nutrient supply from urea	0.00944138	kg	market for concrete, sole plate and foundation	0	m3	heat and power co-generation, biogas, gas engine	2.07652	MJ	production of suspended algae biomass, open race way pond	245.585	kg	production of algae concentrate using flocculation	5.83264	kg	drying of algae concentrate using centrifuge	0.554101	kg	cell disruption, beat milling	0.554101	kg	treatment of extraction residues, spray-drying	0.522681	kg	market for transport, freight, lorry 16-32 metric ton, EURO6	0.00157919	ton kilometer	production of algae oil, hexane extraction	0.0315837	kg	market for transport, freight, lorry 16-32 metric ton, EURO6	0.00115644	ton kilometer
nutrient supply from triple superphosphate	0.00189724	kg	market for polyvinylchloride, bulk polymerised	0	kg	heat and power co-generation, biogas, gas engine	0.402688	kWh	market for lime	0.049117	kg	market for electricity, medium voltage	0.0233306	kWh	Water	-0.000648298	m3	market for electricity, medium voltage	0.0170552	kWh	market for chemical factory, organics	2.61893e-12	unit	market group for transport, freight train	0.00315837	ton kilometer	market for phosphoric acid, industrial grade, without water, in 85% solution state	1.95187e-05	kg	market for transport, pipeline, onshore, petroleum	0.00925151	ton kilometer
CO2 production, biogas CHP with carbon capture	0.327145	kg	market for packaging film, low density polyethylene	0.000545744	kg	CO2 production, biogas CHP with carbon capture	0.327145	kg	market for hydrochloric acid, without water, in 30% solution state	0.0483413	kg	treatment of discharged algae cultivation medium	-0.00527854	m3	Water	0.000648298	m3	heat and power co-generation, natural gas, combined cycle power plant, 400MW electrical	0.193292	MJ	market for electricity, medium voltage	0.0376726	kWh	market for transport, freight, sea, tanker for petroleum	0.110543	ton kilometer	market for sodium hydroxide, without water, in 50% solution state	5.84299e-05	kg	production of fuels from algae oil, hydroprocessing	1	MJ
tap water production, seawater reverse osmosis, conventional pretreatment, baseline module, single stage	0	kg	market for water supply network	5.07131e-09	km				market for electricity, medium voltage	0	kWh	drying of algae concentrate using centrifuge	0.554101	kg	market for electricity, medium voltage	0.0321765	kWh	market for hexane	0.000164235	kg	market for tap water	0.0490723	kg				market for electricity, medium voltage	0.00211436	kWh
market for magnesium sulfate	0	kg	market for waste concrete	0	kg	market for electricity, high voltage	-0.370473	kWh	production of algae concentrate using flocculation	5.83264	kg				cell disruption, beat milling	0.554101	kg	production of algae oil, hexane extraction	0.0315837	kg	heat and power co-generation, natural gas, combined cycle power plant, 400MW electrical	2.32721	MJ				production of fuels from algae oil, hydroprocessing	1	MJ
market for electricity, medium voltage	0.0861782	kWh	market for waste polyvinylchloride	0	kg	heat and power co-generation, natural gas, combined cycle power plant, 400MW electrical	-1.9104	MJ	treatment of discharged algae cultivation medium	-0.0832369	m3							treatment of extraction residues, spray-drying	0.522681	kg	market for soybean meal	-0.0699645	kg				Carbon dioxide, non-fossil	0.0156024	kg
Water(evaporation)	0	m3	market for waste polyethylene	-0.000545744	kg																Water	4.90723e-05	m3				Water (feed&process)	-1.74342e-05	m3
Water (saltwater makeup)	-0.133274	m3	market for decommissioned pipeline, natural gas	-0.000507131	kg				Water to algae	156.613	kg							residues to biogas CHP	0.522681	kg							Water (cooling)	-0.000114649	m3
Water (nutrient left-over)	-0.000230854	m3	infrastructure for algae cultivation	245.585	1/kg_harvest
Carbon dioxide, non-fossil	0.0817863	kg
production of suspended algae biomass, open race way pond	245.585	kg	market for land use change, annual crop	1.70545e-07	ha
			Occupation, industrial area	0.034109	square meter-year
CO2 from biogas	0	kg	Transformation, to industrial area	0.00170545	square meter
			Transformation, from unspecified, natural (non-use)	0.00170545	square meter
net balance
	gross in		gross out		net in [MJ]
electricity	0.714699	MJ	1.3337	MJ	-0.619004	MJ	-0.171946	kWh
heat	2.5205	MJ	1.9104	MJ	0.610099	MJ
CO2	0.327145	kg	0.169125	kg	0.158021	kg
C	0.0933313	kg	0.0461249	kg	0.0472064	kg
algae C in waste water			0.00686432	kg
electricity breakdown
seawater	0.0272379	kWh/MJ	0.0980563	MJ/MJ	#REF!		0.245784	kWh/kg_algae_in_centrate
mixing	0.0589403	kWh/MJ	0.212185	MJ/MJ	#REF!		0.531856	kWh/kg_algae_in_centrate
flocculation	0	kWh/MJ	0	MJ/MJ	#REF!		0	kWh/kg_algae_in_centrate
centrifuge	0.0233306	kWh/MJ	0.08399	MJ/MJ	#REF!		0.210526	kWh/kg_algae_in_centrate
bead mill	0.0321765	kWh/MJ	0.115835	MJ/MJ	#REF!
extraction	0.0170552	kWh/MJ	0.0613988	MJ/MJ	#REF!
valorization	#REF!	kWh/MJ	#REF!	MJ/MJ	#REF!
conversion	0.00211436	kWh/MJ	0.00761168	MJ/MJ	#REF!
	#REF!	kWh/MJ	#REF!	MJ/MJ	#REF!

## Sheet: CO2
in (burdens)									ecoinvent model data
heat	2.07652	MJ	6.3474	MJ/kg_CO2					functional unit	1	m3_biogas
electricity	0.402688	kWh	1.23092	kWh/kg_CO2					heat produced	12.048	MJ/m3	0.557778	MJ_heat/MJ_CH4
									electricity produced	2.3364	kWh/m3	0.3894	MJ_elec/MJ_CH4
out									CO2 emissions	1.8981	kg/m3
heat	1.9104	MJ	5.83961	MJ/kg_CO2					CO2 capture parasitic load	0.08		0.862296	MJ/kg CO2
electricity	0.370473	kWh	1.13244	kWh/kg_CO2
CO2 captured	0.327145	kg	1	kg/kg
									dependent parameters
									CO2 demand for cultivation	0.327145	kg
									biogas fed	0.172354	m3
									electricity produced	0.370473	kWh
									heat produced	1.9104	MJ

## Sheet: ORP
in											reactor design
N	0.00944138	kg	0.076889	kg/kg_algaeDW	3.84445e-05	kg/kg_harvest	0.0202402	kg_urea
P2O5	0.00189724	kg	0.0154508	kg/kg_algaeDW	7.7254e-06	kg/kg_harvest	0.00109165	kg_P			independent parameters
CO2 from power plant	0.327145	kg	2.66422	kg/kg_algaeDW	0.00133211	kg/kg_harvest					Area Productivity	0.015	kg_algaeDW/(m2*d)	0.05	g_algae/(L*d)
CO2 from biogas plant	0	kg	0	kg/kg_algaeDW	0	kg/kg_harvest					Cell density	0.5	kg/m3
fresh water	0	kg	0	kg/kg_algaeDW	0	kg/kg_harvest					Output	0.122792	kg_algaeDW/MJ	245.585	kg_harvest/MJ
salt water	133.274	kg	1.08536	m3/kg_algaeDW	0.00054268	m3/kg_harvest					Density medium	1000	kg/m3
recycled harvest	156.613	kg	1275.43	kg/kg_algaeDW	0.637713	kg/kg_harvest					Life time	20	yrs
MgSO4	0	kg	0	kg/kg_algaeDW	0	kg/kg_harvest
electricity	0.0861782	kWh	0.70182	kWh/kg_algaeDW	0.00035091	kWh/kg_harvest	0.310242	MJ			yearly production	1190	t_fuels / yr	5.14511e+07	MJ/yr	6.3178e+06	kg_algaeDW/yr	1.75494e+06	m2
												952000	L/yr	1.6315	MJ/s	721.21	kg_algaeDW/h	175.494	ha
out														5873.41	MJ/h
evaporation	0.0443417	m3	0.361111	m3/kg_algaeDW	0.000180556	m3/kg_harvest					production period	240	days / year	8	months / year	0.657534	% of the year
harvest	245.585	kg	2000	kg/kg_algaeDW	1	kg/kg_harvest					day time	12	h/day	0.5	% of the day
nutrient left-overs	0.230854	kg	1.88004	kg/kg_algaeDW	-9.40019e-07	m3/kg_harvest
CO2	0.0817863	kg	0.666054	kg/kg_algaeDW	0.000333027	kg/kg_harvest					dependent parameters
											Occupation	8.18616	m2*d	0.034109	m2*a	0.000138889	m2*a/kg_harvest
											Output Volume	0.245585	m3
											Output Algae	0.122792	kg	0.0704033	kg_C
mass balance											Output Water	245.462	kg
in	290.239	kg	2363.66	kg/kg_algaeDW	1.18183	kg/kg_harvest					Output Harvest	245.585	kg
out	290.239	kg	2363.66	kg/kg_algaeDW	1.18183	kg/kg_harvest					nutrients total	0.435433	kg
diff	0	kg	0	kg/kg_algaeDW	0	kg/kg_harvest					nutrient water	0.0829574	kg
											land use	6.94444e-10	ha/kg_harvest
											electricity per CO2 (power plant)	1	kWh/kg
											electricity from power plant	0.327145	kWh	2.66422	kWh/kg_algaeDW	0.00133211	kWh/kg_harvest
											waste water treatment
											total volume	#REF!	m3/MJ	#REF!	m3/yr
											solids	#REF!	kg/MJ	#REF!	kg/yr	#REF!	wt-%
											algae	0.0119723	kg/MJ	615985	kg/yr
												0.00686432	kg_C/MJ	#REF!	kg_C/m3
											impact	0.35	kg_CO2equ/m3	#REF!	kgCO2equ/MJ	#REF!	gCO2equ/MJ

## Sheet: ORP water balance
independent									definition: recyclingratio = recycled.total / harvest.total
Evaporation loss	0.0443417	m3	0.361111	m3/kg_algaeDW	0.000180556	m3/kg_harvest			definition: saltratio = harvest.saltratio / saltwater.saltratio
cultivation salt content	0.0525	wt-%							definition: recyclingloss = harvest.total * (1 - recyclingratio)
salt water salt content	0.035	wt-%							fresh water demand: freshwater.total = evaporation.total + recyclingloss * (1 - saltratio)
recycling ratio	0.638032	kg/kg							salt water demand: saltwater.total = recyclingloss * saltratio
dependent
harvest water (w/o algae)	245.462	kg	1999	kg/kg_algaeDW
metabolized water	0.0829574	kg	2000	kg/kg_algaeDW
recycling loss	88.8493	kg	723.573	kg/kg_algaeDW	salt	4.66459	kg	37.9876	kg/kg_algaeDW
salt ratio	1.5				water	84.1847	kg	685.586	kg/kg_algaeDW
normalized
evaporation	44.3417	kg	0.180556	kg/kg_harvest	361.111	kg/kg_algaeDW
fresh water demand	0	kg	0	kg/kg_harvest	0	kg/kg_algaeDW
salt water demand	133.274	kg	0.54268	kg/kg_harvest	1085.36	kg/kg_algaeDW	salt	4.66459	kg	37.9876	kg/kg_algaeDW
							water	128.609	kg	1047.37	kg/kg_algaeDW
mass balance
in
saltwater	133.274	kg	1085.36	kg/kg_algaeDW	0.54268	kg/kg_harvest	782.773	m3/h
fresh water	0	kg	0	kg/kg_algaeDW	0	kg/kg_harvest	0	m3/h
recycled	156.613	kg	1275.43	kg/kg_algaeDW	0.637713	kg/kg_harvest	919.85	m3/h
out
evaporation	44.3417	kg	361.111	kg/kg_algaeDW	0.180556	kg/kg_harvest	260.437	m3/h
harvest water (w/o algae)	245.462	kg	1999	kg/kg_algaeDW	0.9995	kg/kg_harvest	1441.7	m3/h
metabolized water	0.0829574	kg	0.675591	kg/kg_algaeDW	0.000337795	kg/kg_harvest	0.487243	m3/h
diff	0	kg	0	kg/kg_algaeDW	0	kg/kg_harvest

## Sheet: ORP power
skip
Paddle wheel
Specific energy demand	4000	W/ha		Paddle wheel power	0.0589403	kWh/MJ_fuel	0.212185	MJ/MJ_fuel
	701978	W			0.48	kWh/kg_algaeDW
	1.26356e+07	Wh/d			0.00024	kWh/kg_harvest
	3.03254e+09	Wh/yr
	58.9403	Wh/MJ_fuel
	480	Wh/kg_algaeDW
Seawater flow rate	6.85709e+09	kg/yr
	6.85709e+06	m3/yr
	782.773	avg m3/h
	2380.93	m3/h during production day
Water supply pump
Volume flow	0.217437	m^3/s		Pipe diameter	0.188063	m
Pipe velocity	1.5	m/s		relative roughness	0.00159521
Height differnce	60	m		Re	316960
Pipe horizontal length	1000	m		Pipe friction (lambda)	0	0.0220581	-
absolute roughness	0.3	mm		Pressure loss due to friction	0	kPa	0	0	m
Gravity constant	9.81	m/s^2		Pressure loss due to fittings	0	kPa	0	0	m
Medium density	1000	kg/m^3		Pressure loss due to height diff.	588.6	kPa	1	60	m
No. Fittings per meter pipe length	2	1/km		Pump power consumption (all pipes)	159.979	kW
Average pressure loss coefficient per fitting (ksi)	0	-			0.0272379	kWh/MJ_fuel	0.0980563	MJ/MJ_fuel
Pump efficiency	0.8	%			0.22182	kWh/kg_algaeDW
Number pipes	5.21848	-			0.00011091	kWh/kg_harvest
dynamic viscosity	0.00089	Pa s			0.204375	kWh/m3
Sum
kWh	0.0861782	0.310242	MJ
kWh/kg_algaeDW	0.70182
kWh/kg_harvest	0.00035091

## Sheet: infrastr
in									independent parameters
concrete	0	m3	0	m3/MJ	0	m3/kg_harvest			density concrete	2200	kg/m3
PVC	0	kg	0	kg/MJ	0	kg/kg_harvest			density PVC	1300	kg/m3
LDPE	561582	kg	0.000545744	kg/MJ	2.22222e-06	kg/kg_harvest			density LDPE	915	kg/m3
pipeline	5.21848	km	5.07131e-09	km/MJ	2.06499e-11	km/kg_harvest			concrete demand per reactor area	0	m3/m2
									PVC demand per reactor area	0	m3/m2
concrete EoL	0	kg	0	kg/MJ	0	kg/kg_harvest			LDPE demand per reactor area		m3/m2	pond liner density (LDPE)	320	g/m2
PVC EoL	0	kg	0	kg/MJ	0	kg/kg_harvest			pipeline weight	100000	kg/km
LDPE EoL	-561582	kg	-0.000545744	kg/MJ	-2.22222e-06	kg/kg_harvest
pipeline EoL	-521848	kg	-0.000507131	kg/MJ	-2.06499e-06	kg/kg_harvest
									dependent parameters
									reactor area	1.75494e+06	m2
									reactor life time	20	yrs
									productivity	5.14511e+07	MJ_fuel/yr	1.02902e+09	MJ/life	1.26356e+10	kg_harvest/yr
									concrete demand	0	m3	0	m3/MJ	0	m3/kg_harvest
									PVC demand	0	kg	0	kg/MJ	0	kg/kg_harvest
									LDPE demand	561582	kg	0.000545744	kg/MJ	2.22222e-06	kg/kg_harvest
									pipeline length	5.21848	km	5.07131e-09	km/MJ	2.06499e-11	km/kg_harvest
									back of the envelope
									impact concrete	151	kg_CO2/m3_concrete	0	kg_CO2-equ	0	gCO2equ/MJ
									impact PVC	2.0676	kg_CO2/kg_PVC	0	kg_CO2-equ/MJ	0	gCO2equ/MJ
									impact LDPE	2.6556	kg_CO2/kg_LDPE	0.00144928	kg_CO2-equ/MJ	1.44928	gCO2equ/MJ
									impact pipeline	625000	kg_CO2/km	0.00316957	kgCO2equ/MJ	3.16957	gCO2equ/MJ

## Sheet: nutrients
supply - molar									supply - mass based
	N source	P source	C source	H source	S source	molar mass
name	CH4N2O	Ca(H2PO4)2.H2O	CO2	H2O	MgSO4
molar mass	60.0545	234.049	44.0087	18.0147	120.366					N source	P source	C source	H source	S source
C	1		1			12.0107			C	0.199997	0	0.272916	0	0
H	4	4		2		1.00784			H	0.0671284	0.0172244	0	0.111891	0
O	1	8	2	1	4	15.999			O	0.266408	0.54686	0.727084	0.888109	0.531678
N	2					14.0067			N	0.466467	0	0	0	0
P		2				30.9738			P	0	0.264678	0	0	0
S					1	32.065			S	0	0	0	0	0.266396
Ca		1				40.078			Ca	0	0.171238	0	0	0
Mg					1	24.305			Mg	0	0	0	0	0.201926
	demand	supply	diff
C	0.573352	0.573352	0
H	0.0855763	0.0855763	0
O	0.264731	2.1127	1.84797
N	0.0653556	0.0653556	0
P	0.00889017	0.00889017	0
S	0.00209487	0.00209487	0
Ca	0	0.00575165	0.00575165
Mg	0	0.00158789	0.00158789
nutrient supply [g_nutrient/g_algaeDW]
	N source	P source	C source	H source	S source
	CH4N2O	Ca(H2PO4)2.H2O	CO2	H2O	MgSO4
stoichiometric solution	0.140108	0.0335887	1.99816	0.675591	0.00786375
metabolization efficiency	0.85	1	0.75	1	1
actual supply	0.164833	0.0335887	2.66422	0.675591	0.00786375
supply of main nutrient	0.076889	0.0154508	0.727108	0.0755925	0	(all Mg and S supplied by seawater)
	(as N)	(as P2O5)			0.00209487

## Sheet: algae composition
General composition of algae cells
(Geider & La Roche, 2002)
Biochemical classes in algae cells	Elemental composition	% cell mass (typical values)	kgCarbon kgDW-1	kgHydrogenkgDW-1	kgOxygen kgDW-1	kgNitrogen kgDW-1	kgPhosphorous kgDW-1	kgSulfur kgDW-1
Proteins	C4,43H7O1,44N1,16S0,019	30 - 65	0.531234	0.0704469	0.230016	0.162221	0	0.00608164
Lipids (other than phospholipids)	C40H74O5	10 - 50	0.756566	0.117463	0.125971	0	0	0
Phospholipids	C37,9H72,5O9,4N0,43P	5 - 15	0.636395	0.102112	0.210135	0.00841573	0.0432788	0
Polysaccharids	C6H12O6	5 - 45	0.40002	0.0671418	0.532838	0	0	0
Nucleic Acids	C9,5H13,75O8N3,75P	3,5 - 18	0.336139	0.0408299	0.37705	0.154736	0.0912458	0
Composition of three generic algae strains
Molecule classes in algae cells	Generic A1	Generic A2 (extreme)	Generic A3 (standard)
Proteins	0.35	0.3	0.45
Lipids (other than phospholipids)	0.3	0.5	0.2
Phospholipids	0.1	0.06	0.1
Polysaccharids	0.2	0.1	0.18
Nucleic Acids	0.05	0.04	0.07
Sum	1	1	1
Total carbon content [kgCarbon kgDW-1]	0.573352	0.629285	0.549542
Total hydrogen content [kgHydrogen kgDW-1]	0.0855763	0.0943395	0.0803485
Total oxygen content [kgOxygen kgDW-1]	0.264731	0.212964	0.272019
Total nitrogen content [kgNitrogen kgDW-1]	0.0653556	0.0553606	0.0846724
Total phosphorous content [kgPhos kgDW-1]	0.00889017	0.00624656	0.0107151
Total sulfur content [kgSulf kgDW-1]	0.00209487	0.00182449	0.00273674
Sum	1	1.00002	1.00003
Total energy content [MJ kgDW-1]	24.86	28.304	22.79

## Sheet: flocculation
in										independent parameters
harvest	245.585	kg	0.245585	m3	algae	0.122792	kg	0.0704033	kg_C	recovery efficiency	0.95	wt-%
					water	245.462	kg			concentration factor	40
electricity	0	kWh	0	MJ	0	MJ/kg_harvest				mixing time	5	min	300	s
flocculant	0.049117	kg			0.0002	kg/kg_harvest				electricity demand	0	kW/m3	0	kWh/m3
acid	0.0483413	kg			0.000196842	kg/kg_harvest				flocculant demand	200	mg/L
										density centrate	1000	kg/m3
										HCl concentration	1	kg_HCL/kg_ecoinvent_activity
out
concentrate	5.83264	kg	algae	0.116653	kg	0.0668831	kg_C			dependent parameters
			water	5.71599	kg					feed solid matter	0.0005	wt-%	0.5	kg/m3
waste water to ORP	156.613	kg								concentrate algae concentration	0.02	wt-%	20	kg/m3
waste water to treatment	83.2369	kg	4.28263e+09	kg/yr						molar mass Ca(OH)2	74.0917	g/mol
										molar mass HCl	36.4608	g/mol
										neutralization stoichiometry	2	mol HCl / mol Ca(OH)2
										waste water	239.85	kg	algae	0.00613962	kg	0.00352017	kg_C
													water	239.746	kg
normalized													flocculant	0.049117	kg
harvest	42.1053	kg/kg_concentrate											acid	0.0483413	kg
flocculant	0.00842105	kg/kg_concentrate
acid	0.00828807	kg/kg_concentrate
electricity	0	kWh/kg_concentrate
concentrate	1	kg/kg_concentrate
waste water to ORP	26.8511	kg/kg_concentrate
waste water to treatment	-0.0142709	m3/kg_concentrate

[truncated: 8 more sheets: centrifuge, bead milling, oil extraction, spray drying, oil transport, conversion, fuel transport, fuel combustion]
